# Supplementary material
Source: PubMed Central journal article supplement (PMC4261111)
Supplement: 97320630010679S1.pdf [file 97320630010679S1.pdf]

## Supplementary material:

**Table 1:** Parameters considered for protein structure quality analysis of sigma 1 and sigma 2 GSTs of *A. gossypii*

| Parameter                                                | Standard Range        | Sigma 1 GST | Sigma 2 GST |
|----------------------------------------------------------|-----------------------|-------------|-------------|
| Sequence Identity                                        | 50                    | 48%         | 43.8%       |
| E value                                                  | Less                  | 3.9E-44     | 3.7E-41     |
| QMEANscore4                                              | 0-1                   | 0.722       | 0.714       |
| QMEAN Z score                                            | Not too much negative | -0.962      | -1.076      |
| ERRAT                                                    | 91-95                 | 84.375      | 92.746      |
| Verify 3D                                                | Pass                  | Pass        | Pass        |
| Ramachandran plot<br>(Residues in most favoured regions) | Above 90%             | 91.6%       | 89.6%       |

**Table 2:** Active site residue predicted for model sigma 1 and sigma 2 GSTs

| GST class   | Residues involved in active site                                                                                                                   |
|-------------|----------------------------------------------------------------------------------------------------------------------------------------------------|
| Sigma 1 GST | LEU 87, ILE 88, ILE 90, ASN 91, ASN 94, ILE 95, PHE 128, TYR 129, LYS 132, PHE 133, ILE 136, VAL 137, ASN 140, PHE 144, VAL 145, ASN 146, GLY 147. |
| Sigma 2 GST | LEU 87, ILE 88, ILE 90, ALA 91, ASN 94, ILE 95, PHE 128, TYR 129, ARG 132, PHE 133, ILE 136, ASN 140, PHE 144, VAL 145, ASN 146.                   |

**Table 3:** XP docking of insecticides and plant natural compounds with model sigma 1 GST (accession No: JN989964.1) of *A. gossypii*

| S.No. | Compound Name      | PubChem ID | Sigma 1 GST from <i>A. gossypii</i> |                  |                    | Bond distance (Å) |
|-------|--------------------|------------|-------------------------------------|------------------|--------------------|-------------------|
|       |                    |            | Glide score                         | H- bonding score | H-bond Interaction |                   |
| 1     | Tannin             | 250395     | <b>-8.9</b>                         | <b>-4.6</b>      | GLU 139(O) : L(H)  | 2.35              |
|       |                    |            |                                     |                  | GLU 139(O) : L(H)  | 1.653             |
|       |                    |            |                                     |                  | ASN 140(H) : L(O)  | 2.092             |
|       |                    |            |                                     |                  | GLU 139(O) : L(H)  | 1.758             |
| 2     | Piperonyl butoxide | 5794       | -6.8                                | -4.6             | ASN 140(H) : L(O)  | 2.003             |
|       |                    |            |                                     |                  | ASN 146(H) : L(O)  | 2.192             |
|       |                    |            |                                     |                  | ASN 140(H) : L(O)  | 1.741             |
| 3     | α-mangostin        | 5281650    | -6.6                                | -2.1             | ASN 146(O) : L(H)  | 2.203             |
|       |                    |            |                                     |                  | ASN 146(O) : L(H)  | 2.054             |
| 4     | Capsaicin          | 1548943    | -6.4                                | -1.2             | ASN 140(O) : L(H)  | 2.381             |
|       |                    |            |                                     |                  | PHE 144(H) : L(O)  | 2.046             |
| 5     | Ellagic acid       | 5281855    | -6.2                                | -2.4             |                    |                   |

**Table 4:** XP docking of insecticides and plant natural compounds with sigma 2 GST (accession No: JN989965.1) of *A. gossypii*

| S.No. | Compound Name | PubChem ID | Sigma 2 GST from <i>A. gossypii</i> |                 |                    | Bond Distance (Å) |
|-------|---------------|------------|-------------------------------------|-----------------|--------------------|-------------------|
|       |               |            | Glide Score                         | H-bonding score | H-bond Interaction |                   |
| 1     | Tannins       | 250395     | <b>-8.4</b>                         | <b>-5.2</b>     | ASN 94(H) : L(O)   | 2.009             |
|       |               |            |                                     |                 | LEU 87(O) : L(H)   | 2.245             |
|       |               |            |                                     |                 | ASN 140(H) : L(O)  | 2.099             |
|       |               |            |                                     |                 | ARG 132(H) : L(O)  | 1.922             |
| 2     | Gossypol      | 3503       | -6.2                                | -3.2            | GLU 139(O) : L(H)  | 2.018, 1.719      |
|       |               |            |                                     |                 | PHE 144(O) : L(H)  | 2.120             |
| 3     | Ellagic acid  | 5281855    | -6.1                                | -2.0            | ASN 140(H) : L(O)  | 2.136             |
|       |               |            |                                     |                 | PHE 144 (O) : L(H) | 2.050             |
| 4     | Quercetin     | 5280343    | -5.9                                | -2.4            | ASN 146(H) : L(O)  | 2.115             |
|       |               |            |                                     |                 | ASN 140(O) : L(H)  | 1.929             |
| 5     | α-mangostin   | 5281650    | -5.8                                | -1.9            | ASN 94(H) : L(O)   | 2.485             |
|       |               |            |                                     |                 | ASN 146(H) : L(O)  | 2.303             |
|       |               |            |                                     |                 | ASN 140(O) : L(H)  | 2.029             |
